# Supplementary material for: Improved state-level influenza nowcasting in the United States leveraging Internet-based data and network approaches
Source: PubMed Central journal article supplement (PMC6329822; doi:10.1038/s41467-018-08082-0), 2019-01-11
Supplement: 41467_2018_8082_MOESM1_ESM.pdf [file 41467_2018_8082_MOESM1_ESM.pdf]

# Improved state-level influenza nowcasting in the United States leveraging Internet-based data and network approaches

*Supplementary information*

LU ET AL.

## Supplementary Methods

### ARGO formulation

Let  $y_{i,t}$  be the CDC %ILI in state  $i$  at time  $t$ , and let  $\mathbf{X}_{i,t} = \{X_{i,t,k}\}_{k \in \{1, \dots, M\}}$  be the vector of Internet-based data in corresponding state and time. ARGO assumes a hidden Markov model based on an autoregressive structure with  $N$  lags, as shown below:

$$\begin{array}{ccccccc}
 y_{i,1:N} & \longrightarrow & y_{i,2:(N+1)} & \longrightarrow & \dots & \longrightarrow & y_{i,(T-N+1):T} \\
 \downarrow & & \downarrow & & & & \downarrow \\
 \mathbf{X}_{i,N} & & \mathbf{X}_{i,N+1} & & & & \mathbf{X}_{i,T}
 \end{array}$$

Here, the vectors  $\{y_{i,(t-N+1):t}\}_{t \geq N}$  follow the Markov property, and at time  $T$ , the  $T$ th such vector has not yet been fully observed. Meanwhile, the observed variables  $\mathbf{X}_{i,T}$  depend only the corresponding hidden  $y_{i,T}$ .

### ARGO model

The above formulation results in the model

$$y_{i,t} = \mu_i + \sum_{j=1}^N \alpha_j y_{i,t-j} + \sum_{k=1}^M \beta_k \mathbf{X}_{i,t,k} + \epsilon_t, \quad \epsilon_t \sim \mathcal{N}(0, \sigma^2) \quad (1)$$

We take  $N = 52$  to incorporate short-term and seasonal autoregressive trends within the past year of data, and  $M = 285$  at maximum, corresponding to the number of Google Trends and athenahealth variables. The high number of input variables gives us a  $p > n$  situation, so we impose  $L_1$  regularization. Therefore, we can solve for parameters  $\mu_i$ ,  $\alpha = (\alpha_1, \dots, \alpha_N)$ , and  $\beta = (\beta_1, \dots, \beta_M)$  which minimize the objective function

$$\sum_t \left( y_{i,t} - \mu_i - \sum_{j=1}^N \alpha_j y_{i,t-j} - \sum_{k=1}^M \beta_k \mathbf{X}_{i,t,k} \right)^2 + \lambda_\alpha \|\alpha_j\|_1 + \lambda_\beta \|\beta_k\|_1 \quad (2)$$

using a rolling training window consisting of the 104 weeks prior to time  $t$ , with hyperparameters  $\lambda_\alpha$  and  $\lambda_\beta$ .

## Hyperparameters

The parameters in (2) are governed by hyperparameters  $\lambda_\alpha$  and  $\lambda_\beta$ ; however, we introduced a modification to the model. Rather than adhering to the groups  $\alpha$  and  $\beta$ , we replaced them with more flexible groups in the following manner:

Let  $\gamma = \{\alpha_1, \dots, \alpha_N, \beta_1, \dots, \beta_M\}$  be the set of regularized parameters. Take  $p \subseteq \gamma$  to be a set of ‘‘priority’’ parameters, and  $q = \gamma - p$  to be the remaining parameters. Letting  $\gamma_p$  and  $\gamma_q$  represent the parameter vectors corresponding to these sets, the objective function simply becomes

$$\sum_t \left( y_{i,t} - \mu_i - \sum_{j=1}^N \alpha_j y_{i,t-j} - \sum_{k=1}^M \beta_k \mathbf{X}_{i,t,k} \right)^2 + \lambda_p \|\gamma_p\|_1 + \lambda_q \|\gamma_q\|_1 \quad (3)$$

To limit the model space, we allowed  $p$  to take one of 3 configurations and selected the one with best out-of-sample performance within each state. The configurations are the parameters corresponding to:

1. athenahealth variables
2. athenahealth variables and the most correlated autoregressive terms, e.g.  $\{y_{t-i}\}_{i \in \{1,2,3,6,12,52\}}$
3. athenahealth variables, the 2 most correlated Google Trends variables, and the most correlated autoregressive terms.

To further constrain the search space, we maintain a hyperparameter ratio  $\lambda_p/\lambda_q = 1/10$ . Since  $\lambda_p$  is smaller, this allows the priority parameters to take larger values, effectively giving them more weight in the regression. The single hyperparameter was then determined using 10-fold cross-validation over the training set. In practice, prediction accuracy was robust to the specific value of the ratio.

## Net formulation

While the ARGO model for any given state  $i$  is constrained to the data within state  $i$ , we hypothesized that  $y_{i,t}$  shows spatio-temporal structure with other states  $s \neq i$  in the short term (i.e. over the past 4 weeks). Adopting the previous notation, the Net model is then

$$y_{i,t} = \mu_i + \sum_{j=1}^{52} \alpha_j y_{i,t-j} + \sum_{s \neq i} \sum_{k=0}^3 \beta_{s,k} y_{s,t-k} + \epsilon_t, \quad \epsilon_t \sim \mathcal{N}(0, \sigma^2) \quad (4)$$

Like ARGO, this model was fit using a rolling 104-week window with 10-fold cross-validation for the regularization hyperparameter. However, for prediction at a given time  $t$ , the concurrent %ILI values  $y_{s,t}$  are not yet observed, so we replace them with the corresponding real-time ARGO estimates  $\hat{y}_{s,t}$ . This substitution inherently assumes that ARGO is unbiased, i.e.  $y_{i,t} = \hat{y}_{i,t} + \epsilon_t$ ,  $\epsilon_t \sim \mathcal{N}(0, \sigma^2)$ .

## Supplementary Figures

**Fig 1:** Time series plots displaying the performance of ARGO (blue) and ARGONet (red) over the period September 28, 2014 to May 14, 2017. The official CDC %ILI time series is shown in black. The AR52 benchmark is also displayed (gray dashes). The heatmap under each time series plot indicates which input model the ARGONet ensemble selected as its prediction each week.

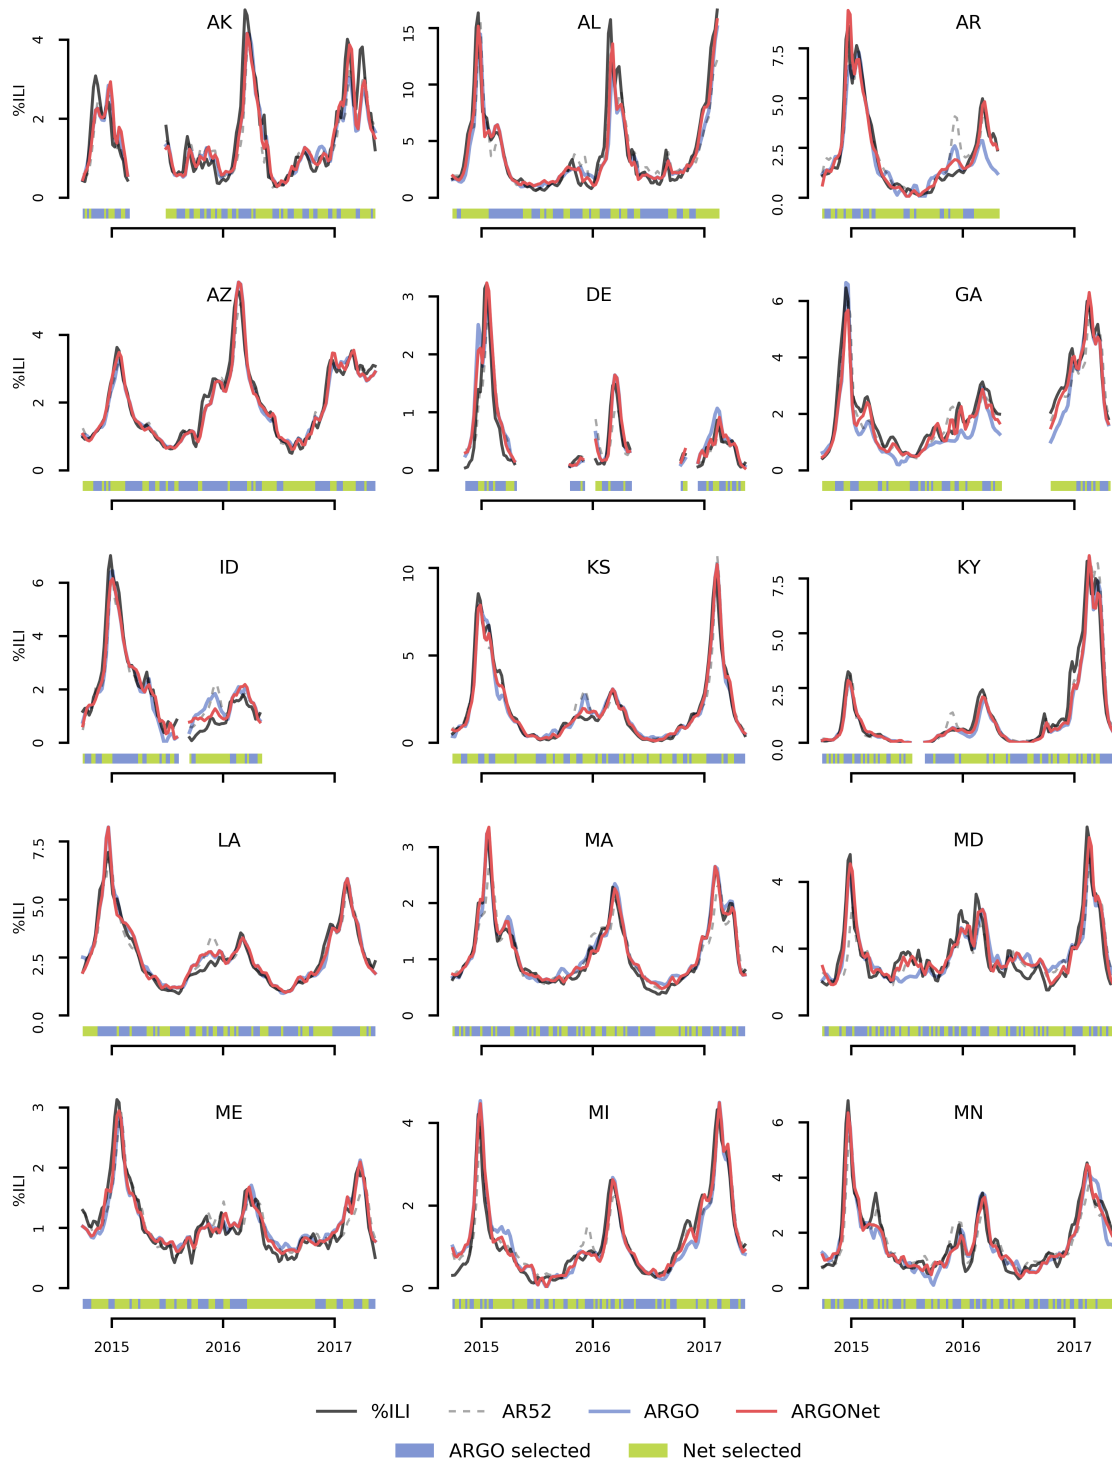

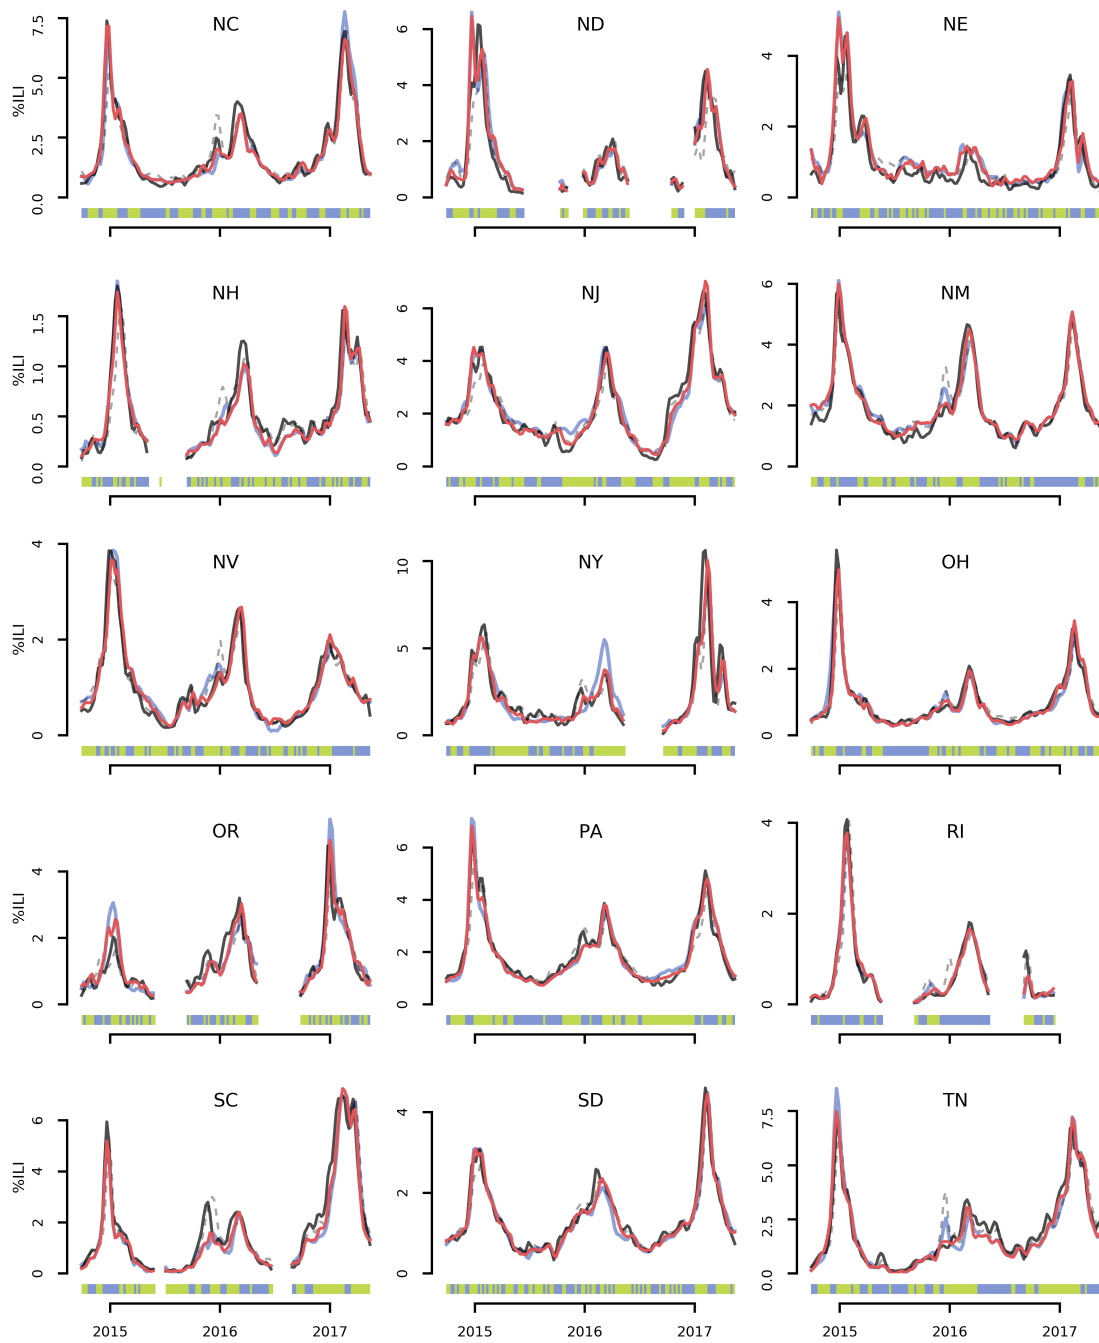

— %ILI    - - - AR52    — ARGO    — ARGONet  
 — ARGO selected    — Net selected

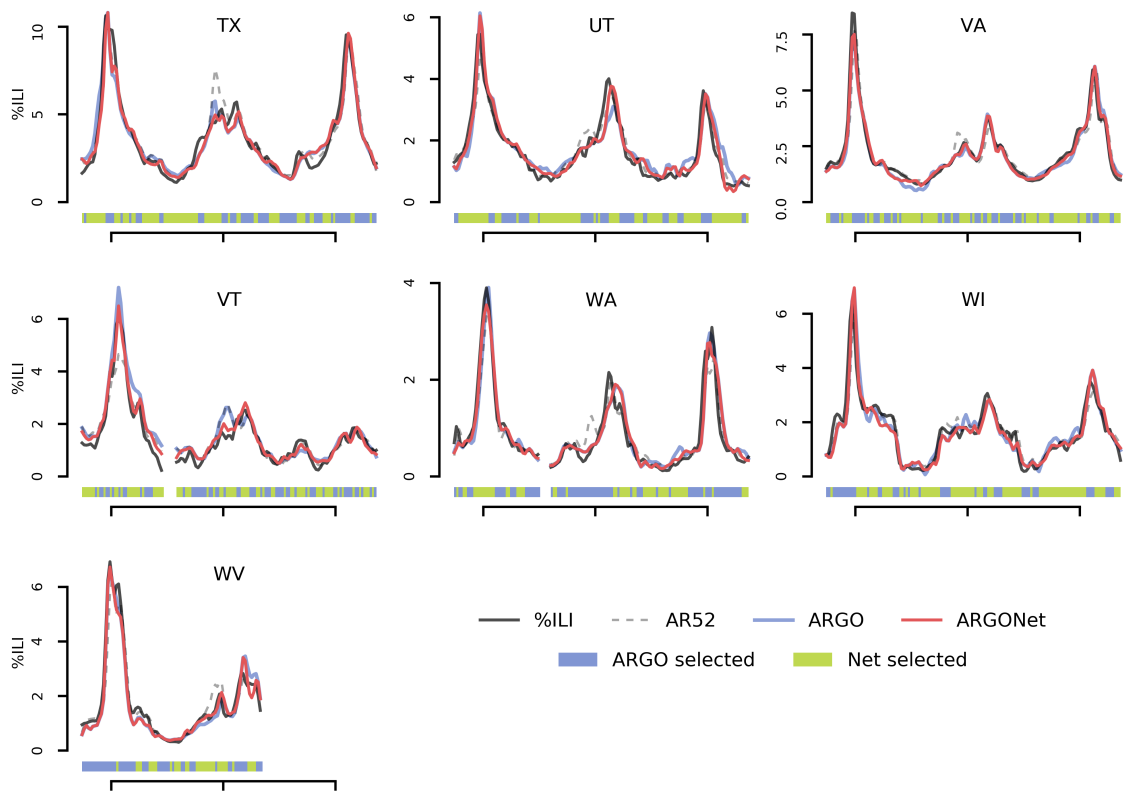

**Fig 2:** Factors associated with the performance improvement of our ensemble over the AR52 benchmark. a) Geographical heatmap of the improvement (%RMSE reduction) of ARGONet over AR52. Possible explanatory factors are b) population, which can affect data quality or spatial structure, c) the number of detectable flu-related Google Trends terms per state, which can be taken as a proxy of search data quality, and d) athenahealth coverage per state, calculated as average visits per thousand. e-i) Regression analysis indicates the presence of associations between e) ARGONet improvement and athenahealth coverage, with one outlier (Wisconsin, colored red) removed, f) ARGONet improvement and Google Trends quality, g) state population and Google Trends quality, h) ARGONet improvement and ILI curve deviation (computed as  $\sigma(Y)/E[Y]$ ), and i) ARGONet improvement and average healthcare providers reporting to CDC over the prediction period.

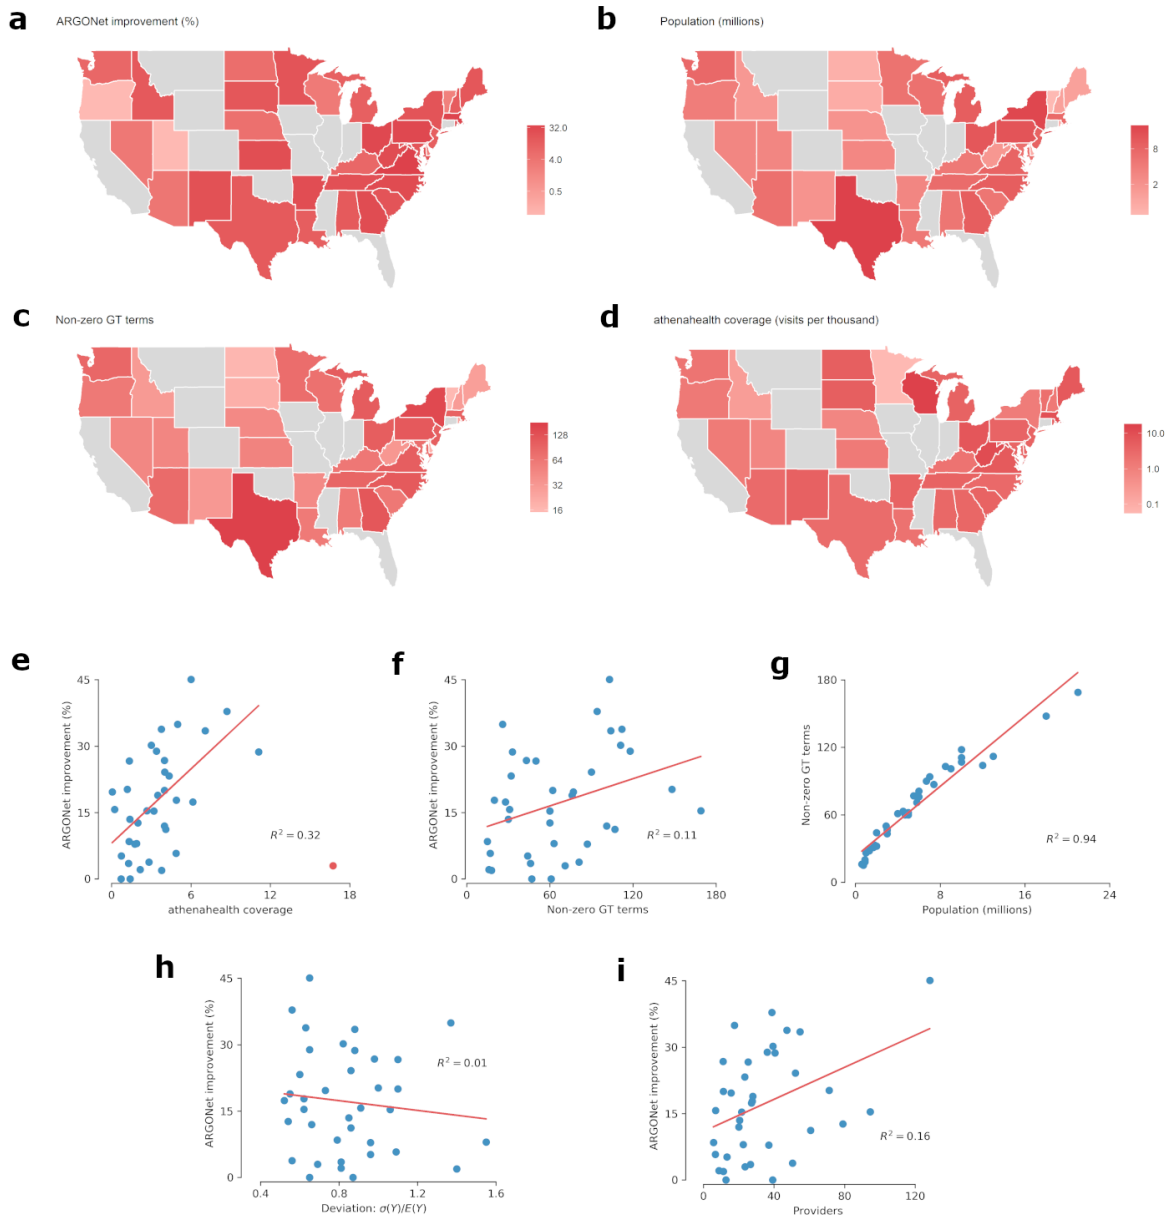

## Supplementary Tables

**Table 1:** Aggregate metrics over each flu season for each state corresponding to the violin plots in Figures 1c and 3c. The reported numbers are the median and interquartile ranges of the aggregates. The final two rows are the best reported aggregates for each metric from Kandula et al. for comparison. These were not discussed in the main paper because of the different time period.

| Model                      | RMSE             | Correlation      | MAPE             |
|----------------------------|------------------|------------------|------------------|
| 2014-15 to 2016-17 seasons |                  |                  |                  |
| ARGONet                    | 0.48 (0.33-0.67) | 0.90 (0.81-0.94) | 0.22 (0.12-0.36) |
| Net                        | 0.51 (0.37-0.71) | 0.90 (0.80-0.93) | 0.23 (0.17-0.39) |
| ARGO                       | 0.51 (0.34-0.75) | 0.89 (0.82-0.94) | 0.24 (0.18-0.38) |
| AR52                       | 0.60 (0.39-0.85) | 0.83 (0.72-0.88) | 0.25 (0.18-0.42) |
| 2012-13 to 2014-15 seasons |                  |                  |                  |
| ARGO                       | 0.56 (0.36-0.77) | 0.93 (0.88-0.95) | 0.25 (0.18-0.38) |
| AR52                       | 0.65 (0.46-0.84) | 0.87 (0.81-0.90) | 0.24 (0.18-0.40) |
| GFT                        | 0.98 (0.55-1.80) | 0.91 (0.84-0.94) | 0.47 (0.29-0.96) |
| 2005-06 to 2010-11 seasons |                  |                  |                  |
| GFT                        | 0.93 (0.66-1.33) | 0.89 (0.80-0.94) | 0.71 (0.44-1.51) |
| Kandula et al.             | 0.84 (0.54-1.25) | 0.86 (0.75-0.91) | 0.54 (0.33-0.90) |

**Table 2:** Distribution of hyperparameter  $K$  for ARGONet model

| $K$ | States                                                 |
|-----|--------------------------------------------------------|
| 1   | AR, ID, MD, MI, MN, NE, NH, NV, OR, SD, VA, WI         |
| 2   | AK, GA, KS, LA, ND, NJ, OH, RI, TX, UT, VT             |
| 3   | AL, AZ, DE, KY, MA, ME, NC, NM, NY, PA, SC, TN, WA, WV |



**Table 3:** Complete search queries downloaded from Google Trends

|                                       |                                      |                                           |                                |
|---------------------------------------|--------------------------------------|-------------------------------------------|--------------------------------|
| a influenza                           | acute bronchitis                     | anas barbariae hepatitis                  | b flu                          |
| baby has rsv                          | baby rsv                             | baby with rsv                             | biacin side effects            |
| body temperature                      | braun thermoscan                     | break a fever                             | breaking a fever               |
| bronchitis                            | can adults get rsv                   | can dogs get the flu from humans          | chest cold                     |
| clarithromycin                        | cold                                 | cold and flu                              | cold or flu                    |
| cold symptoms                         | cold versus flu                      | cold vs flu                               | cold with fever                |
| contagious flu                        | cough and fever                      | cough fever                               | cough headache                 |
| coughing remedies                     | cure flu                             | cure the flu                              | dangerous fever                |
| do i have the flu                     | duration of the flu                  | ear thermometer                           | early flu symptoms             |
| expectorant                           | exposed to flu                       | exposure to flu                           | fever and cold                 |
| fever and cough                       | fever cough                          | fever flu                                 | fever reducer                  |
| fight the flu                         | flu a                                | flu a and b                               | flu a symptoms                 |
| flu and bronchitis                    | flu and cold                         | flu and fever                             | flu and strep                  |
| flu care                              | flu children                         | flu cold                                  | flu complications              |
| flu contagious                        | flu contagious period                | flu cough                                 | flu cures                      |
| flu duration                          | flu fever                            | flu food                                  | flu germs                      |
| flu gestation                         | flu headache                         | flu how long                              | flu in children                |
| flu incubation                        | flu incubation period                | flu lasts                                 | flu length                     |
| flu like symptoms                     | flu medicine                         | flu or cold                               | flu or pneumonia               |
| flu or strep                          | flu prophylaxis                      | flu recovery                              | flu recovery time              |
| flu relief                            | flu remedies                         | flu remedy                                | flu report                     |
| flu reports                           | flu shot                             | flu shot symptoms                         | flu shots                      |
| flu symptoms                          | flu symptoms in toddlers             | flu test                                  | flu treatment                  |
| flu treatments                        | flu type                             | flu type a                                | flu type a symptoms            |
| flu type b                            | flu type b symptoms                  | flu vaccine                               | flu versus cold                |
| flu virus                             | flu vs cold                          | flu while pregnant                        | generic tamiflu                |
| get over the flu                      | get over the flu fast                | get rid of flu                            | get rid of the flu             |
| get rid of the flu fast               | getting over the flu                 | gripe                                     | having the flu                 |
| high fever                            | home remedies for flu                | how contagious is the flu                 | how long am i contagious       |
| how long am i contagious with the flu | how long are you contagious          | how long are you contagious with the flu  | how long contagious            |
| how long does flu last                | how long does influenza last         | how long does it take to get over the flu | how long does rsv last         |
| how long does the flu last            | how long does the flu last in adults | how long does the flu last?               | how long flu                   |
| how long is flu contagious            | how long is rsv contagious           | how long is the flu                       | how long is the flu contagious |
| how to break a fever                  | how to break a fever in adults       | how to cure the flu                       | how to get over flu            |
| how to get over the flu               | how to get rid of flu                | how to get rid of the flu                 | how to reduce fever            |
| how to treat flu                      | how to treat flu symptoms            | how to treat the flu                      | human temperature              |
| i have the flu                        | incubation for flu                   | incubation period flu                     | incubation period for flu      |
| incubation period for influenza       | incubation period for the flu        | influenza a                               | influenza a and b              |
| influenza a contagious                | influenza a incubation               | influenza a incubation period             | influenza a symptoms           |
| influenza a treatment                 | influenza b                          | influenza b symptoms                      | influenza b treatment          |
| influenza contagious                  | influenza incubation                 | influenza incubation period               | influenza symptoms             |
| influenza treatment                   | influenza treatment guidelines       | influenza type a                          | influenza type b               |
| intestinal flu                        | is flu contagious                    | is influenza a contagious                 | is influenza contagious        |
| is rsv contagious                     | is tamiflu an antibiotic             | is the flu contagious                     | is the flu contagious?         |
| medicine for flu                      | medicine for the flu                 | normal body                               | normal body temperature        |
| osillo                                | osillococcinum                       | oseltamivir                               | over the counter flu           |
| over the counter flu medicine         | painful cough                        | pneumonia                                 | positive flu test              |
| pregnant and have the flu             | rapid flu                            | recovering from flu                       | reduce a fever                 |
| reduce fever                          | remedies for flu                     | remedies for the flu                      | respiratory flu                |
| robitussin                            | robitussin cf                        | robitussin cough                          | rsv                            |
| rsv baby                              | rsv contagious                       | rsv in adults                             | rsv infant                     |
| rsv infection                         | rsv symptoms                         | rsv symptoms in adults                    | rsv treatment                  |
| signs of flu                          | signs of rsv                         | signs of the flu                          | sinus                          |
| sinus infection cure                  | sinus infections                     | stomach flu                               | stomach flu symptoms           |
| strep                                 | strep throat                         | symptoms of bronchitis                    | symptoms of flu                |
| symptoms of influenza                 | symptoms of influenza b              | symptoms of pneumonia                     | symptoms of rsv                |
| symptoms of rsv in adults             | symptoms of the flu                  | taking temperature                        | tamiflu and alcohol            |
| tamiflu and breastfeeding             | tamiflu and pregnancy                | tamiflu children                          | tamiflu contagious             |
| tamiflu dosage                        | tamiflu dose                         | tamiflu drug                              | tamiflu drug interactions      |
| tamiflu during pregnancy              | tamiflu generic                      | tamiflu in children                       | tamiflu in pregnancy           |
| tamiflu pediatric dosing              | tamiflu side effects                 | tamiflu suspension                        | tamiflu while pregnant         |
| tamiflu wiki                          | tessalon                             | the flu                                   | the flu symptoms               |
| the flu virus                         | treat flu                            | treat flu symptoms                        | treat the flu                  |
| treating flu                          | treating the flu                     | treatment for flu                         | treatment for rsv              |

|                                   |                            |                                      |                                |
|-----------------------------------|----------------------------|--------------------------------------|--------------------------------|
| treatment for the flu             | tussin                     | tussionex                            | tylenol sinus                  |
| type a and b flu                  | type a flu                 | type a flu symptoms                  | type a influenza               |
| type b flu                        | type b flu symptoms        | type b influenza                     | upper respiratory              |
| walking pneumonia                 | what is flu a              | what is influenza                    | what is influenza a            |
| what is influenza b               | what is rsv                | what is type a flu                   | what to do if you have the flu |
| what to eat when you have the flu | when is the flu contagious | when is the flu no longer contagious | when you have the flu          |
| z pack and alcohol                | thermoscan                 |                                      |                                |

---

**Table 4:** (starting next page) Performance by each model over each season and state.

| Metric | State | Model   | 2012-13 | 2013-14 | 2014-15 | 2015-16 | 2016-17 | Whole Period | GFT Period | ARGONet Period |
|--------|-------|---------|---------|---------|---------|---------|---------|--------------|------------|----------------|
| RMSE   | AK    | GFT     | 1.446   | 0.499   | 0.605   | –       | –       | –            | 0.875      | –              |
|        |       | AR52    | 0.611   | 0.74    | 0.61    | 1.034   | 0.825   | 0.717        | 0.622      | 0.78           |
|        |       | ARGO    | 0.587   | 0.65    | 0.663   | 0.844   | 0.784   | 0.663        | 0.605      | 0.727          |
|        |       | Net     | 0.782   | 0.766   | 0.767   | 0.88    | 0.721   | 0.709        | 0.701      | 0.728          |
|        |       | ARGONet | –       | –       | 0.671   | 0.832   | 0.776   | –            | –          | 0.714          |
|        | AL    | GFT     | 10.042  | 4.097   | 3.561   | –       | –       | –            | 5.484      | –              |
|        |       | AR52    | 1.379   | 0.653   | 2.594   | 3.307   | 3.04    | 2.026        | 1.448      | 2.608          |
|        |       | ARGO    | 1.368   | 0.574   | 2.09    | 3.803   | 2.384   | 1.96         | 1.241      | 2.522          |
|        |       | Net     | 1.2     | 0.587   | 1.629   | 3.215   | 1.839   | 1.649        | 1.021      | 2.108          |
|        |       | ARGONet | –       | –       | 1.584   | 3.486   | 1.854   | –            | –          | 2.208          |
|        | AR    | GFT     | 7.038   | 0.937   | 0.873   | –       | –       | –            | 3.454      | –              |
|        |       | AR52    | 0.656   | 0.989   | 1.382   | 1.136   | –       | 0.926        | 0.894      | 1.125          |
|        |       | ARGO    | 1.368   | 1.011   | 1.062   | 1.13    | –       | 1.007        | 0.997      | 0.991          |
|        |       | Net     | 0.884   | 0.817   | 1.168   | 0.585   | –       | 0.774        | 0.827      | 0.829          |
|        |       | ARGONet | –       | –       | 1.151   | 0.584   | –       | –            | –          | 0.824          |
|        | AZ    | GFT     | 0.999   | 0.396   | 0.524   | –       | –       | –            | 0.567      | –              |
|        |       | AR52    | 0.502   | 0.258   | 0.258   | 0.509   | 0.367   | 0.353        | 0.302      | 0.369          |
|        |       | ARGO    | 0.346   | 0.238   | 0.248   | 0.482   | 0.37    | 0.313        | 0.239      | 0.355          |
|        |       | Net     | 0.428   | 0.215   | 0.221   | 0.569   | 0.392   | 0.344        | 0.255      | 0.387          |
|        |       | ARGONet | –       | –       | 0.229   | 0.487   | 0.373   | –            | –          | 0.355          |
|        | DE    | GFT     | 0.709   | 1.186   | 0.733   | –       | –       | –            | 0.883      | –              |
|        |       | AR52    | 0.665   | 0.667   | 0.602   | 0.352   | 0.186   | 0.518        | 0.629      | 0.412          |
|        |       | ARGO    | 0.589   | 0.646   | 0.637   | 0.251   | 0.196   | 0.492        | 0.608      | 0.405          |
|        |       | Net     | 0.497   | 0.646   | 0.553   | 0.367   | 0.304   | 0.479        | 0.554      | 0.418          |
|        |       | ARGONet | –       | –       | 0.614   | 0.271   | 0.23    | –            | –          | 0.404          |
|        | GA    | GFT     | 5.371   | 1.413   | 1.784   | –       | –       | –            | 2.763      | –              |
|        |       | AR52    | 0.429   | 0.532   | 1.048   | 0.454   | 0.806   | 0.607        | 0.597      | 0.748          |
|        |       | ARGO    | 0.569   | 0.309   | 0.781   | 0.61    | 0.76    | 0.566        | 0.512      | 0.68           |
|        |       | Net     | 0.328   | 0.46    | 1.037   | 0.405   | 0.64    | 0.552        | 0.569      | 0.687          |
|        |       | ARGONet | –       | –       | 0.639   | 0.473   | 0.589   | –            | –          | 0.532          |
|        | ID    | GFT     | 3.833   | 0.932   | 0.793   | –       | –       | –            | 2.083      | –              |
|        |       | AR52    | 0.742   | 1.176   | 0.87    | 0.65    | –       | 0.818        | 0.868      | 0.728          |
|        |       | ARGO    | 0.715   | 0.984   | 0.767   | 0.656   | –       | 0.742        | 0.771      | 0.692          |
|        |       | Net     | 0.961   | 0.995   | 0.806   | 0.429   | –       | 0.772        | 0.845      | 0.633          |
|        |       | ARGONet | –       | –       | 0.703   | 0.453   | –       | –            | –          | 0.614          |
|        | KS    | GFT     | 2.558   | 0.582   | 0.957   | –       | –       | –            | 1.322      | –              |
|        |       | AR52    | 0.835   | 0.78    | 0.865   | 0.646   | 1.153   | 0.728        | 0.682      | 0.781          |
|        |       | ARGO    | 0.691   | 0.755   | 0.848   | 0.498   | 0.759   | 0.611        | 0.642      | 0.623          |
|        |       | Net     | 0.775   | 0.643   | 0.825   | 0.324   | 0.979   | 0.622        | 0.621      | 0.656          |
|        |       | ARGONet | –       | –       | 0.779   | 0.343   | 0.769   | –            | –          | 0.573          |
|        | KY    | GFT     | 1.449   | 0.311   | 0.479   | –       | –       | –            | 0.757      | –              |
|        |       | AR52    | 0.225   | 0.221   | 0.374   | 0.394   | 1.28    | 0.549        | 0.241      | 0.7            |
|        |       | ARGO    | 0.214   | 0.138   | 0.316   | 0.398   | 1.207   | 0.516        | 0.201      | 0.663          |
|        |       | Net     | 0.334   | 0.136   | 0.359   | 0.283   | 1.252   | 0.536        | 0.252      | 0.677          |
|        |       | ARGONet | –       | –       | 0.325   | 0.276   | 1.197   | –            | –          | 0.644          |
| LA     | GFT   | 4.331   | 0.699   | 0.477   | –       | –       | –       | 2.074        | –          |                |
|        | AR52  | 0.762   | 0.939   | 0.566   | 0.501   | 0.465   | 0.563   | 0.638        | 0.442      |                |
|        | ARGO  | 0.902   | 0.551   | 0.509   | 0.33    | 0.435   | 0.505   | 0.583        | 0.383      |                |

|    |         |       |       |       |       |       |       |       |       |
|----|---------|-------|-------|-------|-------|-------|-------|-------|-------|
|    | Net     | 0.706 | 0.623 | 0.727 | 0.425 | 0.548 | 0.526 | 0.577 | 0.509 |
|    | ARGONet | –     | –     | 0.53  | 0.364 | 0.392 | –     | –     | 0.386 |
| MA | GFT     | 2.409 | 0.25  | 0.259 | –     | –     | –     | 1.148 | –     |
|    | AR52    | 0.492 | 0.239 | 0.358 | 0.251 | 0.279 | 0.288 | 0.315 | 0.264 |
|    | ARGO    | 0.298 | 0.136 | 0.173 | 0.156 | 0.105 | 0.174 | 0.189 | 0.15  |
|    | Net     | 0.507 | 0.207 | 0.296 | 0.2   | 0.227 | 0.269 | 0.302 | 0.223 |
|    | ARGONet | –     | –     | 0.194 | 0.185 | 0.139 | –     | –     | 0.164 |
| MD | GFT     | 1.883 | 1.381 | 1.412 | –     | –     | –     | 1.523 | –     |
|    | AR52    | 1.994 | 0.662 | 0.95  | 0.615 | 0.79  | 0.987 | 1.15  | 0.726 |
|    | ARGO    | 2.031 | 0.688 | 0.48  | 0.615 | 0.702 | 0.95  | 1.111 | 0.592 |
|    | Net     | 1.989 | 0.525 | 0.626 | 0.597 | 0.658 | 0.912 | 1.066 | 0.582 |
|    | ARGONet | –     | –     | 0.604 | 0.589 | 0.664 | –     | –     | 0.589 |
| ME | GFT     | 0.831 | 0.469 | 0.662 | –     | –     | –     | 0.597 | –     |
|    | AR52    | 0.551 | 0.279 | 0.404 | 0.351 | 0.319 | 0.346 | 0.366 | 0.328 |
|    | ARGO    | 0.601 | 0.27  | 0.373 | 0.322 | 0.239 | 0.34  | 0.376 | 0.295 |
|    | Net     | 0.519 | 0.293 | 0.295 | 0.29  | 0.229 | 0.306 | 0.336 | 0.255 |
|    | ARGONet | –     | –     | 0.32  | 0.306 | 0.246 | –     | –     | 0.271 |
| MI | GFT     | 0.504 | 1.046 | 0.355 | –     | –     | –     | 0.682 | –     |
|    | AR52    | 0.543 | 0.341 | 0.572 | 0.374 | 0.445 | 0.41  | 0.44  | 0.41  |
|    | ARGO    | 0.516 | 0.281 | 0.515 | 0.255 | 0.5   | 0.388 | 0.413 | 0.389 |
|    | Net     | 0.53  | 0.293 | 0.465 | 0.284 | 0.426 | 0.371 | 0.401 | 0.354 |
|    | ARGONet | –     | –     | 0.496 | 0.284 | 0.417 | –     | –     | 0.364 |
| MN | GFT     | 3.268 | 0.578 | 0.782 | –     | –     | –     | 1.616 | –     |
|    | AR52    | 0.84  | 0.451 | 0.941 | 0.683 | 0.608 | 0.637 | 0.675 | 0.667 |
|    | ARGO    | 0.847 | 0.424 | 0.686 | 0.629 | 0.564 | 0.58  | 0.598 | 0.574 |
|    | Net     | 0.857 | 0.404 | 0.917 | 0.6   | 0.415 | 0.591 | 0.659 | 0.598 |
|    | ARGONet | –     | –     | 0.687 | 0.608 | 0.464 | –     | –     | 0.536 |
| NC | GFT     | 1.713 | 0.381 | 0.47  | –     | –     | –     | 0.914 | –     |
|    | AR52    | 1.181 | 0.654 | 1.129 | 0.522 | 0.913 | 0.796 | 0.878 | 0.775 |
|    | ARGO    | 0.856 | 0.435 | 0.596 | 0.581 | 0.738 | 0.584 | 0.588 | 0.56  |
|    | Net     | 1.077 | 0.406 | 0.543 | 0.563 | 0.727 | 0.623 | 0.66  | 0.536 |
|    | ARGONet | –     | –     | 0.556 | 0.545 | 0.744 | –     | –     | 0.541 |
| ND | GFT     | 2.609 | 0.379 | 1.127 | –     | –     | –     | 1.61  | –     |
|    | AR52    | 1.574 | 0.703 | 1.102 | 0.463 | 1.266 | 1.019 | 1.078 | 0.953 |
|    | ARGO    | 1.621 | 0.812 | 1.365 | 0.456 | 1.07  | 1.068 | 1.199 | 0.99  |
|    | Net     | 1.349 | 0.686 | 0.886 | 0.469 | 1.121 | 0.891 | 0.929 | 0.822 |
|    | ARGONet | –     | –     | 1.223 | 0.48  | 0.963 | –     | –     | 0.898 |
| NE | GFT     | 2.672 | 2.397 | 2.781 | –     | –     | –     | 2.25  | –     |
|    | AR52    | 1.383 | 0.904 | 0.801 | 0.316 | 0.606 | 0.844 | 1.018 | 0.543 |
|    | ARGO    | 1.239 | 1.067 | 0.889 | 0.398 | 0.501 | 0.853 | 1.036 | 0.56  |
|    | Net     | 1.111 | 1.175 | 1.006 | 0.516 | 0.581 | 0.874 | 1.043 | 0.643 |
|    | ARGONet | –     | –     | 0.778 | 0.376 | 0.501 | –     | –     | 0.515 |
| NH | GFT     | 0.511 | 0.197 | 0.299 | –     | –     | –     | 0.313 | –     |
|    | AR52    | 0.46  | 0.213 | 0.29  | 0.201 | 0.32  | 0.272 | 0.295 | 0.245 |
|    | ARGO    | 0.436 | 0.168 | 0.227 | 0.186 | 0.278 | 0.244 | 0.262 | 0.214 |
|    | Net     | 0.404 | 0.152 | 0.251 | 0.166 | 0.272 | 0.234 | 0.252 | 0.213 |
|    | ARGONet | –     | –     | 0.247 | 0.172 | 0.266 | –     | –     | 0.212 |
|    | GFT     | 7.24  | 0.801 | 1.585 | –     | –     | –     | 3.518 | –     |
|    | AR52    | 0.649 | 0.486 | 0.678 | 0.545 | 0.669 | 0.544 | 0.545 | 0.56  |

|    |         |       |       |       |       |       |       |       |       |
|----|---------|-------|-------|-------|-------|-------|-------|-------|-------|
| NJ | ARGO    | 0.857 | 0.432 | 0.467 | 0.593 | 0.707 | 0.556 | 0.547 | 0.524 |
|    | Net     | 0.654 | 0.446 | 0.512 | 0.441 | 0.703 | 0.506 | 0.496 | 0.502 |
|    | ARGONet | –     | –     | 0.5   | 0.477 | 0.683 | –     | –     | 0.493 |
| NM | GFT     | 2.683 | 0.972 | 1.576 | –     | –     | –     | 1.624 | –     |
|    | AR52    | 0.898 | 0.587 | 0.632 | 0.695 | 0.395 | 0.577 | 0.616 | 0.528 |
|    | ARGO    | 0.979 | 0.578 | 0.511 | 0.577 | 0.298 | 0.554 | 0.624 | 0.431 |
|    | Net     | 0.909 | 0.5   | 0.583 | 0.456 | 0.43  | 0.522 | 0.582 | 0.445 |
|    | ARGONet | –     | –     | 0.541 | 0.462 | 0.305 | –     | –     | 0.405 |
| NV | GFT     | 1.904 | 0.789 | 0.97  | –     | –     | –     | 1.164 | –     |
|    | AR52    | 0.469 | 0.426 | 0.484 | 0.419 | 0.233 | 0.358 | 0.388 | 0.346 |
|    | ARGO    | 0.374 | 0.432 | 0.435 | 0.321 | 0.236 | 0.323 | 0.354 | 0.31  |
|    | Net     | 0.532 | 0.425 | 0.459 | 0.391 | 0.346 | 0.372 | 0.396 | 0.353 |
|    | ARGONet | –     | –     | 0.511 | 0.334 | 0.23  | –     | –     | 0.334 |
| NY | GFT     | 2.74  | 0.55  | 1.158 | –     | –     | –     | 1.467 | –     |
|    | AR52    | 0.675 | 0.501 | 0.926 | 0.687 | 2.488 | 1.087 | 0.61  | 1.389 |
|    | ARGO    | 0.974 | 0.413 | 0.66  | 1.056 | 1.925 | 0.967 | 0.62  | 1.171 |
|    | Net     | 0.553 | 0.455 | 0.705 | 0.631 | 1.998 | 0.885 | 0.501 | 1.124 |
|    | ARGONet | –     | –     | 0.591 | 0.679 | 1.983 | –     | –     | 1.108 |
| OH | GFT     | 0.854 | 0.344 | 0.575 | –     | –     | –     | 0.526 | –     |
|    | AR52    | 0.601 | 0.249 | 0.782 | 0.289 | 0.398 | 0.428 | 0.489 | 0.46  |
|    | ARGO    | 0.613 | 0.16  | 0.51  | 0.249 | 0.308 | 0.345 | 0.394 | 0.323 |
|    | Net     | 0.634 | 0.175 | 0.56  | 0.188 | 0.252 | 0.349 | 0.415 | 0.327 |
|    | ARGONet | –     | –     | 0.486 | 0.204 | 0.309 | –     | –     | 0.306 |
| OR | GFT     | 1.758 | 0.538 | 0.278 | –     | –     | –     | 0.932 | –     |
|    | AR52    | 0.709 | 0.752 | 0.372 | 0.648 | 0.901 | 0.62  | 0.553 | 0.618 |
|    | ARGO    | 0.697 | 0.564 | 0.54  | 0.592 | 0.872 | 0.589 | 0.526 | 0.626 |
|    | Net     | 0.56  | 0.717 | 0.461 | 0.599 | 0.871 | 0.583 | 0.514 | 0.607 |
|    | ARGONet | –     | –     | 0.503 | 0.592 | 0.932 | –     | –     | 0.639 |
| PA | GFT     | 1.377 | 0.35  | 1.003 | –     | –     | –     | 0.841 | –     |
|    | AR52    | 0.632 | 0.325 | 0.806 | 0.443 | 0.619 | 0.504 | 0.52  | 0.562 |
|    | ARGO    | 0.688 | 0.309 | 0.56  | 0.36  | 0.433 | 0.423 | 0.459 | 0.406 |
|    | Net     | 0.493 | 0.239 | 0.439 | 0.324 | 0.55  | 0.369 | 0.352 | 0.396 |
|    | ARGONet | –     | –     | 0.463 | 0.332 | 0.467 | –     | –     | 0.372 |
| RI | GFT     | 3.446 | 0.36  | 0.553 | –     | –     | –     | 1.745 | –     |
|    | AR52    | 0.527 | 0.288 | 0.577 | 0.321 | 0.102 | 0.387 | 0.425 | 0.398 |
|    | ARGO    | 0.344 | 0.179 | 0.296 | 0.165 | 0.069 | 0.248 | 0.254 | 0.247 |
|    | Net     | 0.505 | 0.386 | 0.369 | 0.234 | 0.172 | 0.341 | 0.374 | 0.29  |
|    | ARGONet | –     | –     | 0.342 | 0.158 | 0.134 | –     | –     | 0.259 |
| SC | GFT     | 2.505 | 0.733 | 0.803 | –     | –     | –     | 1.316 | –     |
|    | AR52    | 0.53  | 0.376 | 0.798 | 0.693 | 1.126 | 0.639 | 0.502 | 0.774 |
|    | ARGO    | 0.348 | 0.277 | 0.354 | 0.749 | 1.084 | 0.547 | 0.283 | 0.682 |
|    | Net     | 0.506 | 0.36  | 0.491 | 0.579 | 0.949 | 0.52  | 0.387 | 0.608 |
|    | ARGONet | –     | –     | 0.36  | 0.672 | 0.977 | –     | –     | 0.619 |
| SD | GFT     | 2.575 | 0.561 | 1.097 | –     | –     | –     | 1.362 | –     |
|    | AR52    | 0.252 | 0.297 | 0.357 | 0.308 | 0.489 | 0.312 | 0.276 | 0.349 |
|    | ARGO    | 0.319 | 0.254 | 0.333 | 0.344 | 0.366 | 0.293 | 0.278 | 0.314 |
|    | Net     | 0.301 | 0.326 | 0.303 | 0.313 | 0.438 | 0.303 | 0.277 | 0.319 |
|    | ARGONet | –     | –     | 0.305 | 0.33  | 0.32  | –     | –     | 0.287 |
|    | GFT     | 3.414 | 0.552 | 1.053 | –     | –     | –     | 1.708 | –     |

|               |         |       |       |       |       |       |       |       |       |
|---------------|---------|-------|-------|-------|-------|-------|-------|-------|-------|
| TN            | AR52    | 1.065 | 0.853 | 0.742 | 0.937 | 1.124 | 0.804 | 0.738 | 0.824 |
|               | ARGO    | 0.779 | 0.385 | 0.764 | 0.765 | 0.93  | 0.643 | 0.558 | 0.73  |
|               | Net     | 1.067 | 0.52  | 0.505 | 0.606 | 0.859 | 0.642 | 0.615 | 0.614 |
|               | ARGONet | –     | –     | 0.663 | 0.531 | 0.847 | –     | –     | 0.625 |
| TX            | GFT     | 2.526 | 1.318 | 1.8   | –     | –     | –     | 1.636 | –     |
|               | AR52    | 0.836 | 1.003 | 1.529 | 1.097 | 0.892 | 0.937 | 0.977 | 1.046 |
|               | ARGO    | 0.759 | 0.942 | 1.438 | 0.759 | 0.73  | 0.837 | 0.929 | 0.905 |
|               | Net     | 0.733 | 0.964 | 1.68  | 0.711 | 0.806 | 0.892 | 1.006 | 1     |
| ARGONet       | –       | –     | 1.44  | 0.657 | 0.75  | –     | –     | 0.885 |       |
| UT            | GFT     | 1.102 | 0.657 | 0.675 | –     | –     | –     | 0.729 | –     |
|               | AR52    | 0.772 | 0.693 | 0.531 | 0.46  | 0.434 | 0.529 | 0.593 | 0.427 |
|               | ARGO    | 0.819 | 0.365 | 0.519 | 0.537 | 0.593 | 0.535 | 0.546 | 0.502 |
|               | Net     | 0.676 | 0.642 | 0.482 | 0.489 | 0.52  | 0.507 | 0.538 | 0.444 |
| ARGONet       | –       | –     | 0.485 | 0.47  | 0.466 | –     | –     | 0.43  |       |
| VA            | GFT     | 1.328 | 0.436 | 1.492 | –     | –     | –     | 0.976 | –     |
|               | AR52    | 0.739 | 0.286 | 0.901 | 0.391 | 0.69  | 0.539 | 0.572 | 0.597 |
|               | ARGO    | 0.588 | 0.193 | 0.459 | 0.175 | 0.46  | 0.355 | 0.382 | 0.354 |
|               | Net     | 0.662 | 0.217 | 0.563 | 0.191 | 0.441 | 0.385 | 0.431 | 0.372 |
| ARGONet       | –       | –     | 0.459 | 0.155 | 0.428 | –     | –     | 0.328 |       |
| VT            | GFT     | 1.793 | 0.986 | 0.981 | –     | –     | –     | 1.147 | –     |
|               | AR52    | 0.811 | 0.77  | 0.841 | 0.587 | 0.296 | 0.63  | 0.722 | 0.575 |
|               | ARGO    | 0.646 | 0.704 | 0.903 | 0.589 | 0.297 | 0.614 | 0.697 | 0.613 |
|               | Net     | 0.698 | 0.647 | 0.753 | 0.436 | 0.347 | 0.559 | 0.644 | 0.504 |
| ARGONet       | –       | –     | 0.919 | 0.419 | 0.318 | –     | –     | 0.563 |       |
| WA            | GFT     | 2.903 | 0.523 | 0.321 | –     | –     | –     | 1.405 | –     |
|               | AR52    | 0.407 | 0.341 | 0.389 | 0.392 | 0.485 | 0.345 | 0.321 | 0.368 |
|               | ARGO    | 0.405 | 0.261 | 0.329 | 0.335 | 0.455 | 0.311 | 0.286 | 0.33  |
|               | Net     | 0.413 | 0.306 | 0.303 | 0.386 | 0.596 | 0.352 | 0.294 | 0.384 |
| ARGONet       | –       | –     | 0.276 | 0.339 | 0.519 | –     | –     | 0.339 |       |
| WI            | GFT     | 2.98  | 0.958 | 1.21  | –     | –     | –     | 1.586 | –     |
|               | AR52    | 0.532 | 0.499 | 0.801 | 0.383 | 0.428 | 0.506 | 0.545 | 0.537 |
|               | ARGO    | 0.45  | 0.587 | 0.796 | 0.403 | 0.451 | 0.505 | 0.548 | 0.532 |
|               | Net     | 0.425 | 0.55  | 0.745 | 0.376 | 0.421 | 0.475 | 0.51  | 0.504 |
| ARGONet       | –       | –     | 0.794 | 0.38  | 0.402 | –     | –     | 0.521 |       |
| WV            | GFT     | 1.959 | 0.474 | 1.045 | –     | –     | –     | 1.076 | –     |
|               | AR52    | 0.625 | 0.454 | 0.777 | 0.536 | –     | 0.514 | 0.521 | 0.593 |
|               | ARGO    | 0.67  | 0.359 | 0.457 | 0.459 | –     | 0.421 | 0.422 | 0.407 |
|               | Net     | 0.485 | 0.334 | 0.672 | 0.395 | –     | 0.416 | 0.429 | 0.493 |
| ARGONet       | –       | –     | 0.514 | 0.43  | –     | –     | –     | 0.423 |       |
| PEARSON<br>AK | GFT     | 0.673 | 0.932 | 0.768 | –     | –     | –     | 0.669 | –     |
|               | AR52    | 0.655 | 0.77  | 0.772 | 0.701 | 0.717 | 0.751 | 0.749 | 0.734 |
|               | ARGO    | 0.695 | 0.832 | 0.728 | 0.804 | 0.771 | 0.79  | 0.765 | 0.772 |
|               | Net     | 0.667 | 0.764 | 0.628 | 0.818 | 0.784 | 0.762 | 0.713 | 0.77  |
| ARGONet       | –       | –     | 0.723 | 0.815 | 0.75  | –     | –     | 0.781 |       |
| AL            | GFT     | 0.915 | 0.867 | 0.939 | –     | –     | –     | 0.837 | –     |
|               | AR52    | 0.893 | 0.94  | 0.792 | 0.701 | 0.956 | 0.86  | 0.878 | 0.836 |
|               | ARGO    | 0.955 | 0.961 | 0.868 | 0.598 | 0.96  | 0.868 | 0.916 | 0.851 |
|               | Net     | 0.939 | 0.96  | 0.922 | 0.738 | 0.97  | 0.909 | 0.942 | 0.897 |
| ARGONet       | –       | –     | 0.924 | 0.683 | 0.969 | –     | –     | 0.885 |       |



|    |         |       |       |       |       |       |       |       |       |
|----|---------|-------|-------|-------|-------|-------|-------|-------|-------|
|    | ARGONet | -     | -     | 0.842 | 0.718 | 0.885 | -     | -     | 0.824 |
| ME | GFT     | 0.861 | 0.77  | 0.913 | -     | -     | -     | 0.805 | -     |
|    | AR52    | 0.792 | 0.807 | 0.814 | 0.18  | 0.734 | 0.807 | 0.839 | 0.808 |
|    | ARGO    | 0.807 | 0.848 | 0.876 | 0.328 | 0.868 | 0.823 | 0.844 | 0.849 |
|    | Net     | 0.819 | 0.801 | 0.907 | 0.454 | 0.87  | 0.853 | 0.867 | 0.89  |
|    | ARGONet | -     | -     | 0.897 | 0.375 | 0.854 | -     | -     | 0.873 |
| MI | GFT     | 0.945 | 0.879 | 0.976 | -     | -     | -     | 0.855 | -     |
|    | AR52    | 0.902 | 0.876 | 0.843 | 0.805 | 0.91  | 0.914 | 0.901 | 0.914 |
|    | ARGO    | 0.917 | 0.929 | 0.933 | 0.93  | 0.924 | 0.925 | 0.916 | 0.926 |
|    | Net     | 0.907 | 0.916 | 0.923 | 0.899 | 0.916 | 0.931 | 0.919 | 0.94  |
|    | ARGONet | -     | -     | 0.919 | 0.908 | 0.928 | -     | -     | 0.936 |
| MN | GFT     | 0.783 | 0.818 | 0.917 | -     | -     | -     | 0.701 | -     |
|    | AR52    | 0.817 | 0.864 | 0.827 | 0.618 | 0.867 | 0.853 | 0.855 | 0.854 |
|    | ARGO    | 0.862 | 0.88  | 0.912 | 0.721 | 0.883 | 0.884 | 0.891 | 0.896 |
|    | Net     | 0.848 | 0.889 | 0.832 | 0.7   | 0.935 | 0.878 | 0.869 | 0.884 |
|    | ARGONet | -     | -     | 0.91  | 0.703 | 0.915 | -     | -     | 0.907 |
| NC | GFT     | 0.873 | 0.94  | 0.972 | -     | -     | -     | 0.878 | -     |
|    | AR52    | 0.805 | 0.75  | 0.834 | 0.832 | 0.878 | 0.85  | 0.816 | 0.875 |
|    | ARGO    | 0.895 | 0.901 | 0.956 | 0.887 | 0.939 | 0.926 | 0.924 | 0.94  |
|    | Net     | 0.837 | 0.927 | 0.96  | 0.879 | 0.924 | 0.913 | 0.905 | 0.943 |
|    | ARGONet | -     | -     | 0.958 | 0.89  | 0.919 | -     | -     | 0.942 |
| ND | GFT     | 0.565 | 0.928 | 0.812 | -     | -     | -     | 0.672 | -     |
|    | AR52    | 0.701 | 0.776 | 0.804 | 0.675 | 0.558 | 0.807 | 0.828 | 0.751 |
|    | ARGO    | 0.681 | 0.92  | 0.76  | 0.663 | 0.718 | 0.797 | 0.794 | 0.772 |
|    | Net     | 0.804 | 0.805 | 0.881 | 0.675 | 0.729 | 0.856 | 0.875 | 0.834 |
|    | ARGONet | -     | -     | 0.808 | 0.658 | 0.761 | -     | -     | 0.809 |
| NE | GFT     | 0.917 | 0.795 | 0.819 | -     | -     | -     | 0.764 | -     |
|    | AR52    | 0.871 | 0.41  | 0.791 | 0.589 | 0.796 | 0.883 | 0.874 | 0.828 |
|    | ARGO    | 0.906 | 0.711 | 0.809 | 0.622 | 0.874 | 0.881 | 0.866 | 0.856 |
|    | Net     | 0.918 | 0.571 | 0.823 | 0.742 | 0.829 | 0.884 | 0.873 | 0.846 |
|    | ARGONet | -     | -     | 0.861 | 0.68  | 0.863 | -     | -     | 0.878 |
| NH | GFT     | 0.915 | 0.775 | 0.898 | -     | -     | -     | 0.873 | -     |
|    | AR52    | 0.859 | 0.672 | 0.846 | 0.809 | 0.706 | 0.843 | 0.857 | 0.825 |
|    | ARGO    | 0.886 | 0.779 | 0.908 | 0.864 | 0.791 | 0.88  | 0.898 | 0.874 |
|    | Net     | 0.865 | 0.825 | 0.883 | 0.91  | 0.804 | 0.882 | 0.889 | 0.875 |
|    | ARGONet | -     | -     | 0.887 | 0.894 | 0.813 | -     | -     | 0.877 |
| NJ | GFT     | 0.841 | 0.829 | 0.872 | -     | -     | -     | 0.784 | -     |
|    | AR52    | 0.896 | 0.758 | 0.767 | 0.897 | 0.914 | 0.915 | 0.869 | 0.93  |
|    | ARGO    | 0.938 | 0.873 | 0.898 | 0.934 | 0.928 | 0.916 | 0.911 | 0.937 |
|    | Net     | 0.928 | 0.791 | 0.904 | 0.931 | 0.911 | 0.932 | 0.917 | 0.943 |
|    | ARGONet | -     | -     | 0.887 | 0.922 | 0.922 | -     | -     | 0.944 |
| NM | GFT     | 0.874 | 0.892 | 0.944 | -     | -     | -     | 0.866 | -     |
|    | AR52    | 0.823 | 0.904 | 0.876 | 0.809 | 0.938 | 0.891 | 0.889 | 0.896 |
|    | ARGO    | 0.853 | 0.908 | 0.939 | 0.883 | 0.967 | 0.907 | 0.9   | 0.936 |
|    | Net     | 0.873 | 0.946 | 0.927 | 0.93  | 0.939 | 0.916 | 0.911 | 0.931 |
|    | ARGONet | -     | -     | 0.923 | 0.927 | 0.966 | -     | -     | 0.943 |
| NV | GFT     | 0.73  | 0.941 | 0.92  | -     | -     | -     | 0.798 | -     |
|    | AR52    | 0.883 | 0.883 | 0.914 | 0.812 | 0.876 | 0.91  | 0.918 | 0.909 |
|    | ARGO    | 0.925 | 0.88  | 0.932 | 0.902 | 0.875 | 0.928 | 0.934 | 0.929 |



|    |         |       |       |       |       |        |       |       |       |
|----|---------|-------|-------|-------|-------|--------|-------|-------|-------|
|    | Net     | 0.863 | 0.885 | 0.921 | 0.839 | 0.831  | 0.907 | 0.915 | 0.908 |
|    | ARGONet | –     | –     | 0.896 | 0.881 | 0.884  | –     | –     | 0.915 |
| NY | GFT     | 0.864 | 0.875 | 0.883 | –     | –      | –     | 0.745 | –     |
|    | AR52    | 0.878 | 0.853 | 0.861 | 0.755 | 0.651  | 0.798 | 0.897 | 0.764 |
|    | ARGO    | 0.876 | 0.948 | 0.934 | 0.74  | 0.798  | 0.849 | 0.913 | 0.837 |
|    | Net     | 0.922 | 0.905 | 0.925 | 0.791 | 0.781  | 0.874 | 0.939 | 0.853 |
|    | ARGONet | –     | –     | 0.948 | 0.751 | 0.782  | –     | –     | 0.856 |
| OH | GFT     | 0.846 | 0.95  | 0.97  | –     | –      | –     | 0.89  | –     |
|    | AR52    | 0.887 | 0.873 | 0.831 | 0.764 | 0.866  | 0.885 | 0.885 | 0.863 |
|    | ARGO    | 0.89  | 0.961 | 0.932 | 0.839 | 0.931  | 0.931 | 0.931 | 0.935 |
|    | Net     | 0.882 | 0.955 | 0.927 | 0.91  | 0.958  | 0.927 | 0.919 | 0.936 |
|    | ARGONet | –     | –     | 0.941 | 0.897 | 0.932  | –     | –     | 0.943 |
| OR | GFT     | 0.85  | 0.947 | 0.822 | –     | –      | –     | 0.83  | –     |
|    | AR52    | 0.809 | 0.801 | 0.676 | 0.671 | 0.734  | 0.814 | 0.82  | 0.801 |
|    | ARGO    | 0.856 | 0.887 | 0.854 | 0.732 | 0.794  | 0.851 | 0.872 | 0.82  |
|    | Net     | 0.897 | 0.822 | 0.793 | 0.748 | 0.753  | 0.839 | 0.859 | 0.812 |
|    | ARGONet | –     | –     | 0.779 | 0.75  | 0.745  | –     | –     | 0.802 |
| PA | GFT     | 0.873 | 0.954 | 0.943 | –     | –      | –     | 0.818 | –     |
|    | AR52    | 0.887 | 0.913 | 0.869 | 0.773 | 0.872  | 0.905 | 0.911 | 0.889 |
|    | ARGO    | 0.931 | 0.94  | 0.95  | 0.89  | 0.957  | 0.943 | 0.947 | 0.946 |
|    | Net     | 0.942 | 0.955 | 0.971 | 0.908 | 0.907  | 0.951 | 0.962 | 0.948 |
|    | ARGONet | –     | –     | 0.963 | 0.905 | 0.935  | –     | –     | 0.954 |
| RI | GFT     | 0.922 | 0.874 | 0.937 | –     | –      | –     | 0.799 | –     |
|    | AR52    | 0.877 | 0.82  | 0.873 | 0.832 | -0.077 | 0.879 | 0.886 | 0.876 |
|    | ARGO    | 0.971 | 0.935 | 0.97  | 0.959 | 0.386  | 0.954 | 0.963 | 0.956 |
|    | Net     | 0.902 | 0.654 | 0.955 | 0.914 | 0.396  | 0.911 | 0.917 | 0.937 |
|    | ARGONet | –     | –     | 0.956 | 0.961 | 0.047  | –     | –     | 0.949 |
| SC | GFT     | 0.767 | 0.916 | 0.975 | –     | –      | –     | 0.859 | –     |
|    | AR52    | 0.882 | 0.881 | 0.854 | 0.543 | 0.867  | 0.918 | 0.892 | 0.911 |
|    | ARGO    | 0.975 | 0.945 | 0.984 | 0.524 | 0.896  | 0.942 | 0.967 | 0.938 |
|    | Net     | 0.929 | 0.911 | 0.95  | 0.712 | 0.926  | 0.948 | 0.943 | 0.951 |
|    | ARGONet | –     | –     | 0.983 | 0.639 | 0.918  | –     | –     | 0.951 |
| SD | GFT     | 0.787 | 0.799 | 0.888 | –     | –      | –     | 0.775 | –     |
|    | AR52    | 0.93  | 0.841 | 0.902 | 0.806 | 0.894  | 0.919 | 0.924 | 0.91  |
|    | ARGO    | 0.899 | 0.89  | 0.916 | 0.855 | 0.942  | 0.931 | 0.928 | 0.932 |
|    | Net     | 0.919 | 0.847 | 0.927 | 0.823 | 0.929  | 0.932 | 0.931 | 0.932 |
|    | ARGONet | –     | –     | 0.926 | 0.805 | 0.956  | –     | –     | 0.941 |
| TN | GFT     | 0.872 | 0.96  | 0.964 | –     | –      | –     | 0.883 | –     |
|    | AR52    | 0.865 | 0.9   | 0.928 | 0.433 | 0.777  | 0.896 | 0.92  | 0.876 |
|    | ARGO    | 0.932 | 0.981 | 0.961 | 0.563 | 0.875  | 0.937 | 0.96  | 0.917 |
|    | Net     | 0.876 | 0.979 | 0.968 | 0.823 | 0.888  | 0.937 | 0.945 | 0.939 |
|    | ARGONet | –     | –     | 0.953 | 0.841 | 0.89   | –     | –     | 0.936 |
| TX | GFT     | 0.928 | 0.918 | 0.918 | –     | –      | –     | 0.805 | –     |
|    | AR52    | 0.931 | 0.894 | 0.85  | 0.684 | 0.928  | 0.902 | 0.909 | 0.886 |
|    | ARGO    | 0.962 | 0.923 | 0.87  | 0.725 | 0.958  | 0.923 | 0.919 | 0.914 |
|    | Net     | 0.947 | 0.904 | 0.83  | 0.73  | 0.948  | 0.912 | 0.904 | 0.896 |
|    | ARGONet | –     | –     | 0.87  | 0.791 | 0.954  | –     | –     | 0.919 |
|    | GFT     | 0.847 | 0.84  | 0.896 | –     | –      | –     | 0.869 | –     |
|    | AR52    | 0.888 | 0.668 | 0.902 | 0.867 | 0.893  | 0.901 | 0.893 | 0.924 |

|         |         |         |       |       |       |       |       |       |       |       |
|---------|---------|---------|-------|-------|-------|-------|-------|-------|-------|-------|
| MAPE    | UT      | ARGO    | 0.886 | 0.907 | 0.926 | 0.849 | 0.836 | 0.902 | 0.915 | 0.891 |
|         |         | Net     | 0.915 | 0.748 | 0.929 | 0.834 | 0.84  | 0.911 | 0.916 | 0.916 |
|         |         | ARGONet | –     | –     | 0.93  | 0.849 | 0.88  | –     | –     | 0.921 |
|         | VA      | GFT     | 0.948 | 0.977 | 0.973 | –     | –     | –     | 0.829 | –     |
|         |         | AR52    | 0.918 | 0.955 | 0.9   | 0.785 | 0.865 | 0.926 | 0.934 | 0.91  |
|         |         | ARGO    | 0.964 | 0.986 | 0.985 | 0.961 | 0.945 | 0.971 | 0.974 | 0.971 |
|         |         | Net     | 0.94  | 0.978 | 0.963 | 0.957 | 0.946 | 0.964 | 0.965 | 0.967 |
|         |         | ARGONet | –     | –     | 0.983 | 0.97  | 0.95  | –     | –     | 0.975 |
|         | VT      | GFT     | 0.766 | 0.701 | 0.818 | –     | –     | –     | 0.701 | –     |
|         |         | AR52    | 0.864 | 0.743 | 0.888 | 0.668 | 0.807 | 0.872 | 0.853 | 0.875 |
|         |         | ARGO    | 0.915 | 0.826 | 0.898 | 0.676 | 0.826 | 0.891 | 0.877 | 0.897 |
|         |         | Net     | 0.899 | 0.798 | 0.905 | 0.818 | 0.741 | 0.902 | 0.887 | 0.908 |
|         |         | ARGONet | –     | –     | 0.845 | 0.833 | 0.782 | –     | –     | 0.889 |
|         | WA      | GFT     | 0.935 | 0.933 | 0.959 | –     | –     | –     | 0.8   | –     |
|         |         | AR52    | 0.884 | 0.862 | 0.936 | 0.734 | 0.846 | 0.901 | 0.924 | 0.899 |
|         |         | ARGO    | 0.903 | 0.928 | 0.952 | 0.801 | 0.871 | 0.922 | 0.941 | 0.919 |
|         |         | Net     | 0.918 | 0.926 | 0.957 | 0.737 | 0.758 | 0.903 | 0.945 | 0.888 |
|         |         | ARGONet | –     | –     | 0.967 | 0.798 | 0.823 | –     | –     | 0.913 |
|         | WI      | GFT     | 0.922 | 0.557 | 0.91  | –     | –     | –     | 0.655 | –     |
|         |         | AR52    | 0.893 | 0.642 | 0.813 | 0.618 | 0.866 | 0.888 | 0.899 | 0.883 |
| ARGO    |         | 0.931   | 0.66  | 0.863 | 0.64  | 0.868 | 0.895 | 0.903 | 0.894 |       |
| Net     |         | 0.938   | 0.693 | 0.873 | 0.731 | 0.876 | 0.906 | 0.915 | 0.901 |       |
| ARGONet |         | –       | –     | 0.868 | 0.696 | 0.895 | –     | –     | 0.898 |       |
| WV      | GFT     | 0.974   | 0.929 | 0.96  | –     | –     | –     | 0.815 | –     |       |
|         | AR52    | 0.907   | 0.913 | 0.934 | 0.626 | –     | 0.932 | 0.944 | 0.926 |       |
|         | ARGO    | 0.95    | 0.97  | 0.984 | 0.837 | –     | 0.958 | 0.964 | 0.968 |       |
|         | Net     | 0.946   | 0.955 | 0.966 | 0.776 | –     | 0.958 | 0.964 | 0.958 |       |
|         | ARGONet | –       | –     | 0.979 | 0.793 | –     | –     | –     | 0.965 |       |
| AK      | GFT     | 1.213   | 0.352 | 0.737 | –     | –     | –     | 0.94  | –     |       |
|         | AR52    | 0.448   | 0.409 | 0.484 | 0.481 | 0.349 | 0.571 | 0.653 | 0.462 |       |
|         | ARGO    | 0.514   | 0.466 | 0.579 | 0.448 | 0.359 | 0.596 | 0.713 | 0.461 |       |
|         | Net     | 0.49    | 0.416 | 0.71  | 0.458 | 0.306 | 0.581 | 0.706 | 0.475 |       |
|         | ARGONet | –       | –     | 0.595 | 0.475 | 0.334 | –     | –     | 0.465 |       |
| AL      | GFT     | 2.503   | 1.248 | 0.843 | –     | –     | –     | 2.084 | –     |       |
|         | AR52    | 0.419   | 0.164 | 0.244 | 0.798 | 0.514 | 0.521 | 0.418 | 0.547 |       |
|         | ARGO    | 0.54    | 0.151 | 0.226 | 0.72  | 0.426 | 0.492 | 0.431 | 0.494 |       |
|         | Net     | 0.367   | 0.147 | 0.204 | 0.542 | 0.385 | 0.41  | 0.339 | 0.455 |       |
|         | ARGONet | –       | –     | 0.179 | 0.705 | 0.392 | –     | –     | 0.486 |       |
| AR      | GFT     | 3.467   | 0.26  | 0.178 | –     | –     | –     | 1.378 | –     |       |
|         | AR52    | 0.428   | 0.262 | 0.361 | 0.516 | –     | 0.525 | 0.51  | 0.521 |       |
|         | ARGO    | 0.838   | 0.331 | 0.299 | 0.411 | –     | 0.842 | 0.891 | 0.574 |       |
|         | Net     | 0.603   | 0.25  | 0.196 | 0.283 | –     | 0.469 | 0.498 | 0.308 |       |
|         | ARGONet | –       | –     | 0.221 | 0.282 | –     | –     | –     | 0.341 |       |
| AZ      | GFT     | 0.296   | 0.208 | 0.169 | –     | –     | –     | 0.197 | –     |       |
|         | AR52    | 0.166   | 0.122 | 0.117 | 0.14  | 0.144 | 0.163 | 0.14  | 0.174 |       |
|         | ARGO    | 0.146   | 0.12  | 0.097 | 0.159 | 0.141 | 0.153 | 0.121 | 0.17  |       |
|         | Net     | 0.146   | 0.106 | 0.101 | 0.172 | 0.145 | 0.152 | 0.119 | 0.172 |       |
|         | ARGONet | –       | –     | 0.105 | 0.158 | 0.141 | –     | –     | 0.168 |       |
|         | GFT     | 1.072   | 1.068 | 2.747 | –     | –     | –     | 1.59  | –     |       |

|    |         |       |       |       |       |       |       |       |       |
|----|---------|-------|-------|-------|-------|-------|-------|-------|-------|
| DE | AR52    | 0.486 | 0.889 | 2.346 | 1.26  | 1.978 | 1.363 | 1.193 | 1.851 |
|    | ARGO    | 0.64  | 0.893 | 2.342 | 0.97  | 2.128 | 1.377 | 1.263 | 1.802 |
|    | Net     | 0.381 | 0.886 | 3.216 | 1.403 | 3.496 | 1.837 | 1.43  | 2.694 |
|    | ARGONet | –     | –     | 2.399 | 1.097 | 2.693 | –     | –     | 2.056 |
| GA | GFT     | 1.911 | 1.078 | 0.782 | –     | –     | –     | 1.889 | –     |
|    | AR52    | 0.153 | 0.208 | 0.265 | 0.194 | 0.187 | 0.238 | 0.258 | 0.213 |
|    | ARGO    | 0.229 | 0.214 | 0.327 | 0.263 | 0.221 | 0.456 | 0.556 | 0.281 |
|    | Net     | 0.145 | 0.182 | 0.246 | 0.183 | 0.166 | 0.32  | 0.388 | 0.194 |
|    | ARGONet | –     | –     | 0.211 | 0.196 | 0.163 | –     | –     | 0.19  |
| ID | GFT     | 2.677 | 0.843 | 0.228 | –     | –     | –     | 2.303 | –     |
|    | AR52    | 0.636 | 0.375 | 0.218 | 0.748 | –     | 0.884 | 0.794 | 0.742 |
|    | ARGO    | 0.724 | 0.482 | 0.2   | 0.817 | –     | 0.861 | 0.759 | 0.752 |
|    | Net     | 0.702 | 0.519 | 0.221 | 0.495 | –     | 0.957 | 0.878 | 0.789 |
|    | ARGONet | –     | –     | 0.197 | 0.526 | –     | –     | –     | 0.787 |
| KS | GFT     | 0.882 | 0.292 | 0.285 | –     | –     | –     | 0.688 | –     |
|    | AR52    | 0.391 | 0.286 | 0.189 | 0.307 | 0.251 | 0.421 | 0.421 | 0.37  |
|    | ARGO    | 0.344 | 0.311 | 0.23  | 0.252 | 0.191 | 0.484 | 0.502 | 0.409 |
|    | Net     | 0.34  | 0.217 | 0.195 | 0.165 | 0.226 | 0.372 | 0.416 | 0.293 |
|    | ARGONet | –     | –     | 0.191 | 0.203 | 0.205 | –     | –     | 0.315 |
| KY | GFT     | 2.661 | 0.531 | 0.854 | –     | –     | –     | 2.075 | –     |
|    | AR52    | 0.515 | 0.54  | 0.477 | 0.378 | 0.399 | 1.122 | 1.103 | 0.955 |
|    | ARGO    | 0.425 | 0.37  | 0.452 | 0.268 | 0.321 | 0.779 | 0.87  | 0.783 |
|    | Net     | 0.711 | 0.537 | 0.45  | 0.24  | 0.362 | 1.199 | 1.388 | 1.003 |
|    | ARGONet | –     | –     | 0.461 | 0.209 | 0.324 | –     | –     | 0.857 |
| LA | GFT     | 0.667 | 0.154 | 0.103 | –     | –     | –     | 0.252 | –     |
|    | AR52    | 0.135 | 0.118 | 0.094 | 0.163 | 0.109 | 0.119 | 0.12  | 0.114 |
|    | ARGO    | 0.145 | 0.109 | 0.108 | 0.122 | 0.11  | 0.136 | 0.151 | 0.117 |
|    | Net     | 0.168 | 0.126 | 0.115 | 0.144 | 0.127 | 0.141 | 0.143 | 0.137 |
|    | ARGONet | –     | –     | 0.089 | 0.134 | 0.101 | –     | –     | 0.114 |
| MA | GFT     | 0.642 | 0.157 | 0.181 | –     | –     | –     | 0.319 | –     |
|    | AR52    | 0.168 | 0.135 | 0.137 | 0.167 | 0.15  | 0.166 | 0.157 | 0.165 |
|    | ARGO    | 0.123 | 0.082 | 0.074 | 0.123 | 0.072 | 0.138 | 0.125 | 0.135 |
|    | Net     | 0.18  | 0.121 | 0.139 | 0.149 | 0.13  | 0.17  | 0.164 | 0.165 |
|    | ARGONet | –     | –     | 0.095 | 0.131 | 0.088 | –     | –     | 0.135 |
| MD | GFT     | 0.67  | 1.308 | 0.94  | –     | –     | –     | 1.213 | –     |
|    | AR52    | 0.523 | 0.541 | 0.25  | 0.204 | 0.329 | 0.409 | 0.498 | 0.26  |
|    | ARGO    | 0.565 | 0.547 | 0.2   | 0.224 | 0.349 | 0.426 | 0.515 | 0.266 |
|    | Net     | 0.476 | 0.388 | 0.237 | 0.229 | 0.253 | 0.359 | 0.425 | 0.244 |
|    | ARGONet | –     | –     | 0.222 | 0.224 | 0.26  | –     | –     | 0.244 |
| ME | GFT     | 0.306 | 0.343 | 0.417 | –     | –     | –     | 0.401 | –     |
|    | AR52    | 0.199 | 0.235 | 0.201 | 0.26  | 0.214 | 0.255 | 0.231 | 0.273 |
|    | ARGO    | 0.221 | 0.23  | 0.212 | 0.213 | 0.187 | 0.249 | 0.234 | 0.262 |
|    | Net     | 0.241 | 0.219 | 0.181 | 0.228 | 0.185 | 0.247 | 0.238 | 0.243 |
|    | ARGONet | –     | –     | 0.192 | 0.217 | 0.19  | –     | –     | 0.246 |
| MI | GFT     | 0.205 | 0.52  | 0.288 | –     | –     | –     | 0.454 | –     |
|    | AR52    | 0.168 | 0.124 | 0.426 | 0.269 | 0.155 | 0.288 | 0.317 | 0.359 |
|    | ARGO    | 0.19  | 0.132 | 0.533 | 0.202 | 0.211 | 0.318 | 0.365 | 0.399 |
|    | Net     | 0.184 | 0.108 | 0.406 | 0.205 | 0.171 | 0.292 | 0.326 | 0.365 |
|    | ARGONet | –     | –     | 0.45  | 0.216 | 0.155 | –     | –     | 0.385 |



|    |         |       |       |       |       |       |       |       |       |
|----|---------|-------|-------|-------|-------|-------|-------|-------|-------|
|    | ARGONet | -     | -     | 0.191 | 0.172 | 0.14  | -     | -     | 0.166 |
| OR | GFT     | 1.529 | 1.027 | 0.511 | -     | -     | -     | 1.379 | -     |
|    | AR52    | 0.584 | 0.805 | 0.533 | 0.525 | 0.322 | 0.625 | 0.677 | 0.555 |
|    | ARGO    | 0.725 | 0.739 | 0.518 | 0.585 | 0.357 | 0.686 | 0.77  | 0.6   |
|    | Net     | 0.779 | 0.669 | 0.545 | 0.488 | 0.311 | 0.611 | 0.697 | 0.483 |
|    | ARGONet | -     | -     | 0.57  | 0.471 | 0.353 | -     | -     | 0.521 |
| PA | GFT     | 0.378 | 0.162 | 0.27  | -     | -     | -     | 0.28  | -     |
|    | AR52    | 0.157 | 0.139 | 0.171 | 0.136 | 0.188 | 0.178 | 0.175 | 0.182 |
|    | ARGO    | 0.172 | 0.186 | 0.145 | 0.125 | 0.192 | 0.183 | 0.192 | 0.157 |
|    | Net     | 0.134 | 0.142 | 0.115 | 0.107 | 0.172 | 0.152 | 0.155 | 0.141 |
|    | ARGONet | -     | -     | 0.118 | 0.112 | 0.162 | -     | -     | 0.131 |
| RI | GFT     | 1.8   | 0.556 | 1.457 | -     | -     | -     | 1.583 | -     |
|    | AR52    | 0.344 | 0.452 | 0.542 | 0.629 | 0.46  | 0.731 | 0.738 | 0.722 |
|    | ARGO    | 0.313 | 0.294 | 0.368 | 0.31  | 0.302 | 0.558 | 0.644 | 0.424 |
|    | Net     | 0.455 | 0.496 | 0.67  | 0.457 | 0.749 | 0.764 | 0.862 | 0.685 |
|    | ARGONet | -     | -     | 0.402 | 0.289 | 0.544 | -     | -     | 0.47  |
| SC | GFT     | 1.996 | 0.796 | 0.643 | -     | -     | -     | 1.357 | -     |
|    | AR52    | 0.299 | 0.422 | 0.429 | 0.406 | 0.262 | 0.718 | 0.726 | 0.647 |
|    | ARGO    | 0.296 | 0.273 | 0.383 | 0.336 | 0.266 | 0.635 | 0.67  | 0.563 |
|    | Net     | 0.288 | 0.309 | 0.335 | 0.307 | 0.215 | 0.597 | 0.658 | 0.476 |
|    | ARGONet | -     | -     | 0.328 | 0.31  | 0.226 | -     | -     | 0.485 |
| SD | GFT     | 0.867 | 0.323 | 0.301 | -     | -     | -     | 0.722 | -     |
|    | AR52    | 0.201 | 0.19  | 0.167 | 0.149 | 0.192 | 0.279 | 0.327 | 0.198 |
|    | ARGO    | 0.277 | 0.176 | 0.148 | 0.167 | 0.158 | 0.279 | 0.344 | 0.175 |
|    | Net     | 0.248 | 0.191 | 0.154 | 0.143 | 0.15  | 0.275 | 0.332 | 0.178 |
|    | ARGONet | -     | -     | 0.15  | 0.152 | 0.154 | -     | -     | 0.17  |
| TN | GFT     | 1.221 | 0.552 | 0.45  | -     | -     | -     | 1.121 | -     |
|    | AR52    | 0.381 | 0.355 | 0.241 | 0.404 | 0.227 | 0.759 | 1.016 | 0.365 |
|    | ARGO    | 0.425 | 0.384 | 0.31  | 0.339 | 0.204 | 0.681 | 0.91  | 0.356 |
|    | Net     | 0.373 | 0.278 | 0.305 | 0.232 | 0.187 | 0.659 | 0.903 | 0.358 |
|    | ARGONet | -     | -     | 0.295 | 0.225 | 0.183 | -     | -     | 0.321 |
| TX | GFT     | 0.331 | 0.275 | 0.243 | -     | -     | -     | 0.268 | -     |
|    | AR52    | 0.122 | 0.105 | 0.181 | 0.179 | 0.167 | 0.153 | 0.145 | 0.176 |
|    | ARGO    | 0.113 | 0.138 | 0.211 | 0.139 | 0.175 | 0.161 | 0.168 | 0.179 |
|    | Net     | 0.14  | 0.117 | 0.163 | 0.141 | 0.189 | 0.148 | 0.144 | 0.16  |
|    | ARGONet | -     | -     | 0.169 | 0.122 | 0.185 | -     | -     | 0.156 |
| UT | GFT     | 0.18  | 0.221 | 0.17  | -     | -     | -     | 0.393 | -     |
|    | AR52    | 0.147 | 0.189 | 0.122 | 0.189 | 0.286 | 0.294 | 0.328 | 0.211 |
|    | ARGO    | 0.149 | 0.141 | 0.151 | 0.184 | 0.492 | 0.346 | 0.349 | 0.296 |
|    | Net     | 0.134 | 0.187 | 0.136 | 0.176 | 0.328 | 0.292 | 0.32  | 0.219 |
|    | ARGONet | -     | -     | 0.134 | 0.161 | 0.326 | -     | -     | 0.222 |
| VA | GFT     | 0.341 | 0.183 | 0.34  | -     | -     | -     | 0.256 | -     |
|    | AR52    | 0.139 | 0.082 | 0.112 | 0.117 | 0.143 | 0.115 | 0.11  | 0.121 |
|    | ARGO    | 0.097 | 0.078 | 0.127 | 0.055 | 0.136 | 0.114 | 0.119 | 0.13  |
|    | Net     | 0.131 | 0.071 | 0.139 | 0.073 | 0.099 | 0.105 | 0.118 | 0.103 |
|    | ARGONet | -     | -     | 0.125 | 0.054 | 0.096 | -     | -     | 0.097 |
| VT | GFT     | 0.387 | 0.242 | 0.333 | -     | -     | -     | 0.487 | -     |
|    | AR52    | 0.211 | 0.22  | 0.268 | 0.438 | 0.295 | 0.341 | 0.322 | 0.431 |
|    | ARGO    | 0.184 | 0.195 | 0.313 | 0.438 | 0.372 | 0.368 | 0.35  | 0.491 |

|    |         |       |       |       |       |       |       |       |       |
|----|---------|-------|-------|-------|-------|-------|-------|-------|-------|
|    | Net     | 0.198 | 0.175 | 0.242 | 0.428 | 0.354 | 0.322 | 0.273 | 0.416 |
|    | ARGONet | –     | –     | 0.26  | 0.365 | 0.359 | –     | –     | 0.397 |
| WA | GFT     | 1.442 | 0.311 | 0.243 | –     | –     | –     | 0.672 | –     |
|    | AR52    | 0.214 | 0.28  | 0.238 | 0.552 | 0.278 | 0.353 | 0.289 | 0.389 |
|    | ARGO    | 0.272 | 0.285 | 0.2   | 0.337 | 0.417 | 0.34  | 0.289 | 0.353 |
|    | Net     | 0.239 | 0.254 | 0.185 | 0.481 | 0.48  | 0.334 | 0.267 | 0.361 |
|    | ARGONet | –     | –     | 0.177 | 0.36  | 0.36  | –     | –     | 0.309 |
| WI | GFT     | 1.462 | 0.493 | 0.467 | –     | –     | –     | 0.715 | –     |
|    | AR52    | 0.293 | 0.232 | 0.221 | 0.177 | 0.251 | 0.5   | 0.468 | 0.493 |
|    | ARGO    | 0.428 | 0.258 | 0.246 | 0.18  | 0.264 | 0.509 | 0.525 | 0.464 |
|    | Net     | 0.263 | 0.261 | 0.26  | 0.155 | 0.224 | 0.446 | 0.455 | 0.424 |
|    | ARGONet | –     | –     | 0.256 | 0.167 | 0.216 | –     | –     | 0.437 |
| WV | GFT     | 1.279 | 0.249 | 0.307 | –     | –     | –     | 0.674 | –     |
|    | AR52    | 0.263 | 0.255 | 0.205 | 0.249 | –     | 0.27  | 0.281 | 0.23  |
|    | ARGO    | 0.287 | 0.222 | 0.182 | 0.2   | –     | 0.261 | 0.281 | 0.197 |
|    | Net     | 0.284 | 0.212 | 0.224 | 0.179 | –     | 0.272 | 0.299 | 0.206 |
|    | ARGONet | –     | –     | 0.188 | 0.19  | –     | –     | –     | 0.202 |
